# Supplementary material
Source: Springer Nature journal article supplement (https://www.springermedizin.de/resource/supplementary/12968_2009_936_MOESM4_ESM.pdf/9580092)



Search area  
(50mm radius  
around isocentre)

Isocentre

"Great vessel" ROI  
(30mm diameter)

Supplement: MOESM4 [file 9580092]
